# Supplementary material
Source: PubMed Central journal article supplement (PMC11027728)
Supplement: 262_2020_2545_MOESM1_ESM.pdf [file 262_2020_2545_MOESM1_ESM.pdf]

Supplementary Materials for  
**Tumor immune microenvironment in cancer patients with leukocytosis**

Kyung Hwan Kim, M.D.<sup>1,2</sup>, Nam Suk Sim, M.D.<sup>1</sup>, Jee Suk Chang, M.D.<sup>2</sup>, Yong Bae Kim, M.D., Ph.D.<sup>2</sup>

<sup>1</sup>Graduate School of Medical Science and Engineering, Korea Advanced Institute of Science and Technology, Daejeon, Republic of Korea.

<sup>2</sup>Department of Radiation Oncology, Yonsei Cancer Center, Yonsei University College of Medicine, Seoul, Republic of Korea.

**This file includes:**

Supplementary Fig. 1

Supplementary Table 1

Supplementary Methods

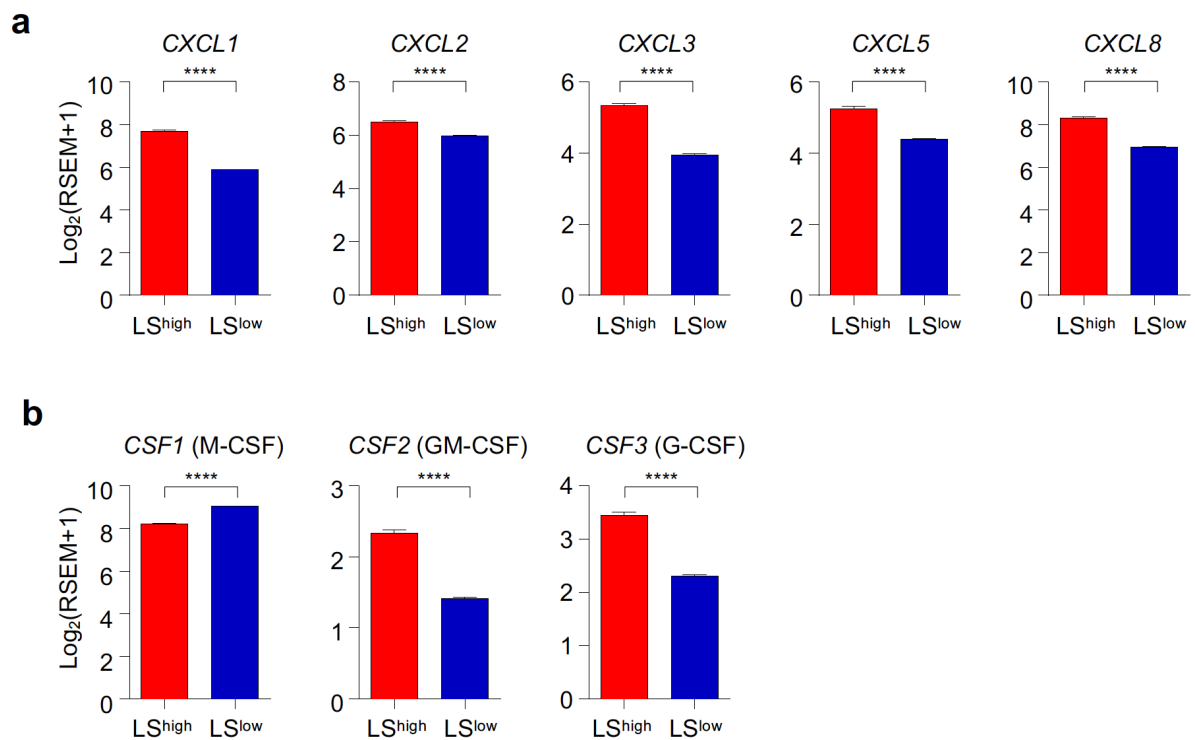

**Supplementary Figure 1. Expression of selected genes in LS<sup>high</sup> and LS<sup>low</sup> tumors of the pan-cancer cohort. a** Expression of selected CXCR2-related chemokines in LS<sup>high</sup> (n = 2496) and LS<sup>low</sup> (n = 7488) tumors. **b** Expression of *CSF1*, *CSF2*, and *CSF3* in LS<sup>high</sup> (n = 2496) and LS<sup>low</sup> (n = 7488) tumors. Bar graphs represent mean and s.e.m. Student's t-test (A, B). \*\*\*\*, p<0.0001.

**Supplementary Table 1. Differentially expressed genes (log<sub>2</sub>fold change > 1, adjusted *P* <0.05) between TRL<sup>pos</sup> and TRL<sup>neg</sup> tumors.**

| Genes          | log <sub>2</sub> fold change | p-value  | adjusted <i>P</i> |
|----------------|------------------------------|----------|-------------------|
| SOX2           | -6.79477709                  | 6.21E-23 | 1.07E-18          |
| GALNT5         | -4.275293287                 | 1.05E-18 | 9.02E-15          |
| KAL1           | -2.644190163                 | 2.37E-18 | 1.36E-14          |
| SLITRK3        | -23.55465378                 | 8.52E-16 | 3.66E-12          |
| RTEL1-TNFRSF6B | -26.98047132                 | 1.53E-15 | 5.27E-12          |
| MAGEA6         | 26.78859858                  | 2.42E-15 | 6.94E-12          |
| SLC15A2        | -3.275534792                 | 5.53E-15 | 1.36E-11          |
| CA11           | -3.696152668                 | 8.74E-15 | 1.88E-11          |
| MPP6           | 2.072290777                  | 1.06E-14 | 2.03E-11          |
| C7             | -25.6557989                  | 3.39E-14 | 5.83E-11          |
| ACTL8          | 25.49943771                  | 4.83E-14 | 7.56E-11          |
| ZNF611         | -3.188252636                 | 5.89E-14 | 8.45E-11          |
| KIAA0513       | -1.940448695                 | 7.76E-14 | 1.03E-10          |
| CHRD1          | -25.16982208                 | 1.02E-13 | 1.25E-10          |
| PAX3           | 24.95802065                  | 1.63E-13 | 1.87E-10          |
| DAW1           | 24.62515224                  | 3.39E-13 | 3.65E-10          |
| TMEM110-MUSTN1 | 24.36683395                  | 5.96E-13 | 6.03E-10          |
| GRB14          | 8.239134538                  | 7.11E-13 | 6.79E-10          |
| APOBEC3F       | -2.142497688                 | 1.54E-12 | 1.40E-09          |
| CACNA1B        | 23.73569131                  | 2.30E-12 | 1.98E-09          |
| NYNRIN         | -3.386123118                 | 9.93E-12 | 8.14E-09          |
| PKP2           | 3.154691817                  | 3.21E-11 | 2.51E-08          |
| CD1C           | -10.52678689                 | 6.81E-11 | 5.10E-08          |
| MID1           | -3.175969631                 | 8.92E-11 | 6.40E-08          |
| SPINK6         | 10.16666551                  | 9.78E-11 | 6.73E-08          |
| SESN3          | -2.43963219                  | 1.06E-10 | 7.03E-08          |
| APOL1          | -2.781444478                 | 2.26E-10 | 1.44E-07          |
| SEC1P          | -9.046776965                 | 3.33E-10 | 2.05E-07          |
| ID2            | -2.190312856                 | 4.98E-10 | 2.96E-07          |
| CD1E           | -9.7485652                   | 6.42E-10 | 3.68E-07          |
| SUSD4          | -3.854633137                 | 9.90E-10 | 5.49E-07          |
| PAQR5          | 4.099098428                  | 1.11E-09 | 5.97E-07          |
| KBTBD12        | -7.290014505                 | 1.29E-09 | 6.74E-07          |
| ABCA13         | -4.107358981                 | 2.10E-09 | 1.06E-06          |
| TRHR           | 8.528991882                  | 2.21E-09 | 1.08E-06          |
| DDX26B         | -1.558507933                 | 2.98E-09 | 1.42E-06          |
| SLC1A3         | -2.664536766                 | 3.72E-09 | 1.73E-06          |
| MAML3          | -1.512298897                 | 3.96E-09 | 1.79E-06          |
| DMP1           | -4.425717665                 | 4.53E-09 | 2.00E-06          |
| ADAMTSL4       | 1.428238592                  | 4.77E-09 | 2.05E-06          |
| WFDC2          | -5.706709672                 | 4.95E-09 | 2.08E-06          |
| EPB41L1        | -2.5805146                   | 5.58E-09 | 2.28E-06          |
| TXNIP          | -2.080089768                 | 5.71E-09 | 2.28E-06          |
| AQPEP          | 9.135324368                  | 7.17E-09 | 2.80E-06          |
| METTL7A        | -3.579507581                 | 8.47E-09 | 3.24E-06          |
| MYLIP          | -2.007162629                 | 9.01E-09 | 3.37E-06          |
| GSTM2          | -2.152888686                 | 9.39E-09 | 3.44E-06          |
| SNAI2          | 1.310952637                  | 9.87E-09 | 3.54E-06          |
| ZNF177         | -6.748123335                 | 1.04E-08 | 3.67E-06          |
| NME2           | 1.85833086                   | 1.31E-08 | 4.46E-06          |
| DAPL1          | -5.68546884                  | 1.34E-08 | 4.46E-06          |
| SYNPO2         | -3.430408178                 | 1.35E-08 | 4.46E-06          |

|            |              |          |             |
|------------|--------------|----------|-------------|
| ATP1B1     | -1.681022985 | 1.85E-08 | 6.01E-06    |
| KRT17      | 3.016501546  | 2.15E-08 | 6.81E-06    |
| SLFN5      | -1.945985321 | 2.22E-08 | 6.81E-06    |
| AASS       | -1.646056058 | 2.20E-08 | 6.81E-06    |
| CYP4X1     | -3.448005286 | 3.06E-08 | 9.23E-06    |
| RTP4       | -2.11409825  | 4.26E-08 | 1.26E-05    |
| APOBEC3D   | -2.556007124 | 4.61E-08 | 1.34E-05    |
| NEFH       | 5.955453806  | 4.92E-08 | 1.41E-05    |
| MAPK10     | -3.946051622 | 5.25E-08 | 1.48E-05    |
| SSBP2      | -2.302883927 | 6.54E-08 | 1.82E-05    |
| TRIM2      | -2.612972623 | 7.07E-08 | 1.91E-05    |
| ZNF81      | -1.652900324 | 7.10E-08 | 1.91E-05    |
| CCDC60     | -6.78912381  | 8.03E-08 | 2.12E-05    |
| FAM102A    | -1.75458244  | 9.76E-08 | 2.54E-05    |
| CCT7       | 1.068300165  | 1.22E-07 | 3.09E-05    |
| ZNF470     | -3.089938083 | 1.22E-07 | 3.09E-05    |
| KIAA1683   | -2.012566068 | 1.29E-07 | 3.22E-05    |
| BCL2L12    | 1.550399895  | 1.35E-07 | 3.28E-05    |
| CHST9      | -8.566320919 | 1.35E-07 | 3.28E-05    |
| TET2       | -1.659122756 | 1.42E-07 | 3.39E-05    |
| SMOC1      | 6.415290126  | 1.46E-07 | 3.45E-05    |
| APOBEC3C   | -1.200827663 | 1.95E-07 | 4.53E-05    |
| MAGEA3     | 10.7322197   | 2.10E-07 | 4.81E-05    |
| PADI3      | -8.147480023 | 2.29E-07 | 5.18E-05    |
| ZNF586     | -2.154405899 | 2.38E-07 | 5.27E-05    |
| OPHN1      | -1.86080735  | 2.39E-07 | 5.27E-05    |
| FJX1       | 2.721702348  | 2.60E-07 | 5.60E-05    |
| MEIS1      | -2.179200596 | 2.59E-07 | 5.60E-05    |
| NGFR       | -5.261798457 | 2.85E-07 | 6.05E-05    |
| SNORD93    | 2.699760903  | 2.98E-07 | 6.25E-05    |
| KRBOX4     | -1.384370148 | 3.48E-07 | 7.21E-05    |
| CERS2      | 1.620464609  | 3.81E-07 | 7.81E-05    |
| GPR153     | 2.62914813   | 5.27E-07 | 0.000106778 |
| L1CAM      | 4.389714504  | 5.36E-07 | 0.000107264 |
| CYP4Z2P    | -6.6834593   | 7.69E-07 | 0.000149265 |
| MCF2L      | -1.923510235 | 7.72E-07 | 0.000149265 |
| ZNF614     | -2.070461404 | 9.01E-07 | 0.000172186 |
| SNORD116-9 | -5.039110509 | 1.03E-06 | 0.000194966 |
| HMCN2      | -5.119775582 | 1.06E-06 | 0.000197998 |
| CD207      | -9.95904778  | 1.25E-06 | 0.00022925  |
| LGALS3     | -1.021365346 | 1.25E-06 | 0.00022925  |
| ADH4       | -4.296790384 | 1.27E-06 | 0.000229487 |
| RNF138P1   | -2.459303288 | 1.41E-06 | 0.000253043 |
| ANAPC15    | 1.79954193   | 1.71E-06 | 0.000302547 |
| GUSBP3     | -1.56519272  | 1.74E-06 | 0.000305534 |
| HES4       | 2.357776016  | 1.79E-06 | 0.000310684 |
| GUSBP2     | -1.522639582 | 1.97E-06 | 0.000338325 |
| NDUFA4     | 1.103278434  | 2.02E-06 | 0.000343549 |
| GAL        | 7.004482589  | 2.12E-06 | 0.000353398 |
| CALML5     | -7.434639316 | 2.11E-06 | 0.000353398 |
| GAL3ST2    | -5.823920536 | 2.15E-06 | 0.000355943 |
| OSBP2      | 4.182546042  | 2.35E-06 | 0.000381319 |
| C21orf91   | -1.679347206 | 2.34E-06 | 0.000381319 |
| CGNL1      | -3.703265855 | 3.01E-06 | 0.000483911 |
| COLCA1     | -6.784719193 | 3.32E-06 | 0.000528978 |
| ZNF836     | -1.64014723  | 3.40E-06 | 0.000533866 |
| ARHGAP26   | -1.260394844 | 3.41E-06 | 0.000533866 |
| DSG2       | 1.735690918  | 3.47E-06 | 0.000535183 |
| EDARADD    | -2.270030592 | 3.51E-06 | 0.000535183 |

|            |              |          |             |
|------------|--------------|----------|-------------|
| CACHD1     | -1.637657127 | 3.51E-06 | 0.000535183 |
| PYGL       | 1.747956117  | 3.57E-06 | 0.000538914 |
| MMP13      | -3.794252555 | 3.84E-06 | 0.00057404  |
| NAGK       | -1.266445119 | 3.92E-06 | 0.000581625 |
| ARHGEF3    | -1.601591663 | 4.02E-06 | 0.000586571 |
| CYLD       | -1.403128004 | 4.01E-06 | 0.000586571 |
| CCL19      | -6.103543255 | 4.20E-06 | 0.000602234 |
| ATXN1      | -1.26136561  | 4.18E-06 | 0.000602234 |
| NENF       | 1.447747081  | 4.26E-06 | 0.000605598 |
| MAML2      | -1.678948833 | 4.30E-06 | 0.000606743 |
| CHD6       | -1.001677368 | 4.60E-06 | 0.000642933 |
| TMTC2      | -1.562677787 | 4.84E-06 | 0.000672371 |
| PPAP2A     | -1.365094622 | 5.04E-06 | 0.00069336  |
| CNTNAP3P2  | -14.65063849 | 5.43E-06 | 0.000738653 |
| ZNF827     | -2.219381212 | 5.45E-06 | 0.000738653 |
| MAD2L2     | 2.130001461  | 5.68E-06 | 0.000763379 |
| CISD1      | 1.88745205   | 5.79E-06 | 0.000763814 |
| RPE65      | 12.56920864  | 5.84E-06 | 0.000763814 |
| TSHZ2      | -3.266863554 | 5.81E-06 | 0.000763814 |
| MMP24      | -1.521299762 | 5.86E-06 | 0.000763814 |
| CASK       | -1.382647513 | 6.32E-06 | 0.00081775  |
| FOXQ1      | -2.998025406 | 6.51E-06 | 0.000836094 |
| NDUFB9     | 1.119953467  | 6.61E-06 | 0.000841968 |
| GADD45GIP1 | 1.911023061  | 6.98E-06 | 0.000876793 |
| FFAR4      | -4.059100598 | 6.96E-06 | 0.000876793 |
| TNFRSF6B   | 2.981680853  | 7.14E-06 | 0.000888478 |
| NHLH2      | -7.733209855 | 7.19E-06 | 0.000888478 |
| AMOT       | -3.761701618 | 7.23E-06 | 0.000888478 |
| FCGBP      | -4.285228223 | 7.42E-06 | 0.000905613 |
| PIK3R1     | -2.271179368 | 7.91E-06 | 0.000958348 |
| SLC39A6    | 2.128318611  | 8.35E-06 | 0.000998081 |
| COL9A2     | -3.456176103 | 8.33E-06 | 0.000998081 |
| SRMS       | 7.944297512  | 8.46E-06 | 0.00100382  |
| RARB       | -2.549389269 | 8.76E-06 | 0.001032559 |
| EML6       | -1.906543979 | 8.92E-06 | 0.00103741  |
| CEP97      | -1.073634725 | 8.89E-06 | 0.00103741  |
| DAPP1      | -1.955048997 | 9.07E-06 | 0.001047508 |
| SPTSSB     | -6.107965147 | 1.02E-05 | 0.00117168  |
| CFL1       | 1.255051862  | 1.04E-05 | 0.001184202 |
| MOCOS      | 2.857411125  | 1.09E-05 | 0.00122288  |
| MALL       | -2.499269085 | 1.10E-05 | 0.001225845 |
| TTC9       | -2.894253423 | 1.14E-05 | 0.001261446 |
| UPK1B      | -10.87294926 | 1.16E-05 | 0.001274873 |
| MYBPC2     | -7.808697968 | 1.25E-05 | 0.001368152 |
| DSPP       | -3.737827444 | 1.32E-05 | 0.001433502 |
| CXCL14     | -5.403113224 | 1.35E-05 | 0.001457958 |
| F3         | 3.293586861  | 1.39E-05 | 0.001490124 |
| PFN1       | 1.049035825  | 1.40E-05 | 0.00149779  |
| ZNF708     | -2.022744343 | 1.45E-05 | 0.001538324 |
| LTBR       | 1.480495125  | 1.65E-05 | 0.001741687 |
| DTX3       | -1.703406741 | 1.66E-05 | 0.001742099 |
| TMOD2      | -1.143022986 | 1.67E-05 | 0.001742099 |
| SAPCD1     | -9.198438251 | 1.69E-05 | 0.001756782 |
| POF1B      | -2.171906847 | 1.75E-05 | 0.001800015 |
| ZNF347     | -2.714700829 | 1.82E-05 | 0.00186618  |
| NDUFAF4    | 1.598903629  | 1.86E-05 | 0.001893693 |
| ZG16B      | -4.074146136 | 1.88E-05 | 0.001898505 |
| SCN7A      | -9.662915866 | 1.92E-05 | 0.00193329  |
| IL1B       | 3.069230459  | 2.03E-05 | 0.002026186 |

|               |              |          |             |
|---------------|--------------|----------|-------------|
| NDUFC2        | 1.436210776  | 2.07E-05 | 0.002030662 |
| CAPN6         | -9.684763137 | 2.05E-05 | 0.002030662 |
| PIK3C2B       | -1.701054095 | 2.05E-05 | 0.002030662 |
| LRRC37A3      | -1.115085523 | 2.08E-05 | 0.002030662 |
| GAGE2A        | 7.956087563  | 2.18E-05 | 0.002119711 |
| SCNN1G        | -4.925524941 | 2.28E-05 | 0.002203485 |
| TRIM22        | -1.739234861 | 2.32E-05 | 0.002232581 |
| EYA2          | -2.412903177 | 2.38E-05 | 0.002260577 |
| WISP3         | -5.968248476 | 2.45E-05 | 0.002302942 |
| ELN           | -3.863555079 | 2.44E-05 | 0.002302942 |
| NPNT          | -2.044270367 | 2.48E-05 | 0.002322116 |
| CPS1          | 5.90750055   | 2.67E-05 | 0.002471486 |
| RUFY4         | -4.330551452 | 2.68E-05 | 0.002471486 |
| CDH26         | -3.559320185 | 2.69E-05 | 0.002471486 |
| CX3CL1        | -3.865420445 | 2.75E-05 | 0.002513856 |
| GPR152        | -7.544419607 | 2.77E-05 | 0.002523966 |
| NPIPA3        | 4.394518977  | 2.85E-05 | 0.002580289 |
| IMPAD1        | 1.049305818  | 2.88E-05 | 0.00258682  |
| CXCL3         | 3.187767747  | 2.90E-05 | 0.00258682  |
| CDC14A        | -2.064366158 | 2.89E-05 | 0.00258682  |
| GRAMD1B       | 2.982352764  | 2.96E-05 | 0.002622779 |
| TMEM63C       | -4.440173178 | 2.99E-05 | 0.002634993 |
| UBA7          | -1.545872344 | 3.04E-05 | 0.002673466 |
| NPM3          | 2.18360317   | 3.14E-05 | 0.002731937 |
| LGALS9C       | -5.319178606 | 3.13E-05 | 0.002731937 |
| TRAFD1        | -1.037064815 | 3.17E-05 | 0.002744479 |
| FAM156A       | 4.325756125  | 3.29E-05 | 0.002835122 |
| GATS          | -1.914368043 | 3.47E-05 | 0.002971908 |
| EHF           | -2.168537544 | 3.56E-05 | 0.003015932 |
| PTPRS         | -1.759966225 | 3.54E-05 | 0.003015932 |
| FGFR4         | 5.130591325  | 3.91E-05 | 0.003262254 |
| SCPEP1        | -1.943657907 | 3.90E-05 | 0.003262254 |
| PARD6B        | -1.305989817 | 3.89E-05 | 0.003262254 |
| EFHD2         | 1.718228443  | 3.96E-05 | 0.003263811 |
| KIAA1549L     | 3.033686383  | 3.94E-05 | 0.003263811 |
| CCDC146       | -2.004995426 | 3.95E-05 | 0.003263811 |
| ECHS1         | 1.004808006  | 4.00E-05 | 0.003275231 |
| IL13RA2       | 8.964654602  | 4.07E-05 | 0.003301833 |
| DNM1P46       | -2.500277614 | 4.06E-05 | 0.003301833 |
| TDRD5         | 11.8967354   | 4.12E-05 | 0.00333116  |
| SLC35B2       | 1.69772259   | 4.30E-05 | 0.003449284 |
| TLX3          | 8.871743178  | 4.52E-05 | 0.003599014 |
| C11orf24      | 1.813443269  | 4.56E-05 | 0.003616287 |
| VAV3          | -2.049904508 | 4.59E-05 | 0.003625938 |
| SURF4         | 1.248462468  | 4.72E-05 | 0.003706952 |
| IKZF2         | -1.811322935 | 4.89E-05 | 0.003828705 |
| ATXN7L1       | -1.043038706 | 4.98E-05 | 0.003879266 |
| STXBP6        | 7.493195644  | 5.04E-05 | 0.003908049 |
| OR2A20P       | -1.820270121 | 5.41E-05 | 0.004136136 |
| GATA3         | -2.167499246 | 5.45E-05 | 0.004149095 |
| SEC11A        | 1.287120431  | 5.54E-05 | 0.004200273 |
| C1orf110      | -6.152688458 | 5.70E-05 | 0.004303916 |
| MTHFD1L       | 1.99357165   | 5.90E-05 | 0.004435954 |
| CXCL8         | 2.958818953  | 5.96E-05 | 0.004445527 |
| GPR34         | -1.410385738 | 5.97E-05 | 0.004445527 |
| SLX1A-SULT1A3 | -1.17852368  | 6.18E-05 | 0.004586049 |
| SIDT1         | -2.883639949 | 6.25E-05 | 0.004613196 |
| CP            | -4.073066332 | 6.40E-05 | 0.004707783 |
| NLRP7         | -3.924800615 | 6.47E-05 | 0.004735297 |

|           |              |             |             |
|-----------|--------------|-------------|-------------|
| POLR2F    | 1.272025542  | 6.51E-05    | 0.004747285 |
| LOC399815 | 2.774329796  | 6.60E-05    | 0.004794034 |
| SLC25A39  | 1.604719033  | 6.82E-05    | 0.004910367 |
| FOSB      | -4.215542727 | 6.81E-05    | 0.004910367 |
| MCMBP     | 1.06492321   | 7.51E-05    | 0.005341434 |
| APOL3     | -1.746872517 | 7.50E-05    | 0.005341434 |
| KLHL13    | -2.057064263 | 7.75E-05    | 0.005485132 |
| ZNF137P   | -2.673697625 | 7.79E-05    | 0.005496164 |
| SYTL5     | -5.127407443 | 8.01E-05    | 0.005603149 |
| LRP8      | 1.817336736  | 8.10E-05    | 0.005645148 |
| PRSS12    | -2.079501976 | 8.23E-05    | 0.005714244 |
| RASSF6    | -1.555717614 | 8.42E-05    | 0.005818997 |
| BDH2      | -1.411296507 | 9.15E-05    | 0.006296235 |
| BTN3A2    | -1.726974147 | 9.22E-05    | 0.006318156 |
| STC1      | 4.129140378  | 9.43E-05    | 0.006439368 |
| CRYBG3    | -1.299933301 | 9.55E-05    | 0.006493249 |
| IGFBP5    | -4.053992889 | 9.81E-05    | 0.006646701 |
| BNIP3     | 2.127034347  | 9.86E-05    | 0.006655203 |
| IGFBP2    | -3.320514701 | 9.90E-05    | 0.006658268 |
| CCDC88B   | -1.656804398 | 0.000100941 | 0.006759114 |
| CBX6      | -2.04991545  | 0.000103905 | 0.006930605 |
| KCNJ12    | 4.586527424  | 0.000105455 | 0.006959584 |
| CADM3     | -9.535252084 | 0.000105552 | 0.006959584 |
| AGL       | -2.266110723 | 0.000105405 | 0.006959584 |
| NAIP      | -1.114519942 | 0.000106825 | 0.007016582 |
| AVPI1     | 2.658635439  | 0.000107468 | 0.007031988 |
| PXN       | 1.56458588   | 0.00010943  | 0.007133268 |
| APOBEC3G  | -1.965703857 | 0.000117263 | 0.007586404 |
| ARHGAP24  | -2.255098804 | 0.000118688 | 0.007649842 |
| EMR4P     | -1.281574069 | 0.000119667 | 0.007684134 |
| SHROOM2   | -1.893480493 | 0.000120429 | 0.007704333 |
| MAGEA1    | 12.33378694  | 0.00012455  | 0.007880071 |
| ZNF549    | -2.251602606 | 0.0001238   | 0.007880071 |
| SLC9A7    | -1.62156394  | 0.000124226 | 0.007880071 |
| KRT24     | -12.62680071 | 0.000128148 | 0.008078044 |
| MRPL52    | 1.275334485  | 0.000129367 | 0.00812509  |
| TMPRSS2   | -3.315632432 | 0.000129847 | 0.008125583 |
| THAP4     | 1.176616761  | 0.000133105 | 0.00827292  |
| GAPDH     | 1.28970388   | 0.000133644 | 0.00827292  |
| PCCA      | -1.135158076 | 0.000133345 | 0.00827292  |
| CKS1B     | 1.566057254  | 0.000145644 | 0.008929769 |
| HLF       | -3.849356388 | 0.000145811 | 0.008929769 |
| RFPL1     | 6.047488961  | 0.00014679  | 0.008957838 |
| LDLRAD4   | -2.344302279 | 0.000148615 | 0.009037141 |
| C21orf140 | -1.741574159 | 0.00014957  | 0.00906323  |
| CSNK1E    | 1.676131875  | 0.000151719 | 0.009146199 |
| KRT7      | -4.842338141 | 0.000153758 | 0.009155809 |
| IDO1      | -2.727618586 | 0.000153237 | 0.009155809 |
| IRX5      | -2.092247881 | 0.000152739 | 0.009155809 |
| LRRC59    | 1.62167397   | 0.000154835 | 0.009156542 |
| NBEA      | -2.890355025 | 0.000154798 | 0.009156542 |
| PTP4A1    | 2.184022727  | 0.000156659 | 0.009221959 |
| CLDN11    | -3.172218936 | 0.000157013 | 0.009221959 |
| SOX9      | 1.334025657  | 0.000160005 | 0.009271108 |
| VSTM5     | 6.898610962  | 0.000159517 | 0.009271108 |
| MLYCD     | -1.416255252 | 0.000158689 | 0.009271108 |
| GUSBP4    | -1.016009859 | 0.000159921 | 0.009271108 |
| MAD2L1BP  | 1.050429194  | 0.000163008 | 0.009413449 |
| MPPED2    | -6.159725001 | 0.000166362 | 0.009574982 |

|              |              |             |             |
|--------------|--------------|-------------|-------------|
| ACSS1        | -1.620666794 | 0.000170868 | 0.009801544 |
| SFXN4        | 1.306211852  | 0.000171641 | 0.009813165 |
| RPF2         | 1.184004883  | 0.000173627 | 0.009866289 |
| ATP9A        | -1.67842356  | 0.000173716 | 0.009866289 |
| MAP3K1       | -1.280608443 | 0.000175416 | 0.009930038 |
| GSTO2        | 1.502023198  | 0.000176792 | 0.009975114 |
| ARID5B       | -1.537911203 | 0.000177958 | 0.010008128 |
| ROBO2        | -5.576649583 | 0.000180949 | 0.010110255 |
| SEMA6D       | -2.75012608  | 0.000180945 | 0.010110255 |
| PSMB7        | 1.134911085  | 0.000192616 | 0.010686117 |
| PITPNM2      | 1.374004711  | 0.000193119 | 0.010686117 |
| KAT2B        | -1.910186647 | 0.000192109 | 0.010686117 |
| PTGES        | 2.903863388  | 0.000197855 | 0.010740975 |
| GAGE8        | 11.26034115  | 0.00019543  | 0.010740975 |
| CCDC162P     | -5.657767877 | 0.000196626 | 0.010740975 |
| ZNF878       | -3.966057312 | 0.000195778 | 0.010740975 |
| PARM1        | -1.734198254 | 0.000197545 | 0.010740975 |
| LGR4         | -1.810828234 | 0.000198739 | 0.010755023 |
| LRRC37A4P    | -1.787037008 | 0.000199665 | 0.010771258 |
| CHCHD2       | 1.14876531   | 0.000203385 | 0.010937672 |
| PM20D2       | 1.977773262  | 0.000204906 | 0.010985117 |
| MRPS24       | 2.685451897  | 0.000210782 | 0.011247577 |
| ACACB        | -1.630034894 | 0.000211109 | 0.011247577 |
| LOC100996634 | -5.071407063 | 0.000212796 | 0.011302473 |
| POLR3G       | 1.981100484  | 0.000222099 | 0.011688375 |
| FAM72B       | 1.494743903  | 0.000233474 | 0.012228745 |
| ERGIC1       | 1.755458372  | 0.000233788 | 0.012228745 |
| ABI3BP       | -3.35888721  | 0.000235377 | 0.012274563 |
| MARK1        | -1.923875659 | 0.000239988 | 0.012439617 |
| RAB36        | -1.802242195 | 0.000240878 | 0.012448269 |
| NT5C3B       | 1.022393764  | 0.000244736 | 0.012609747 |
| ZNF702P      | -4.024402954 | 0.000246405 | 0.012657884 |
| ZBTB22       | -2.367096121 | 0.000248208 | 0.012712519 |
| SRM          | 1.797027979  | 0.000251332 | 0.012827193 |
| ADAM22       | -2.886848727 | 0.000251937 | 0.012827193 |
| ZNF100       | -1.514810329 | 0.0002601   | 0.013164887 |
| SYT17        | -2.205719374 | 0.000260908 | 0.013167052 |
| PRSS45       | -7.415598538 | 0.000261704 | 0.013168606 |
| BCCIP        | 1.191532765  | 0.000263935 | 0.013242159 |
| NAALADL2     | -3.127178049 | 0.000266031 | 0.013269934 |
| PKD1L2       | -4.788358795 | 0.000267665 | 0.013312831 |
| GGCT         | 1.114131593  | 0.00027618  | 0.013696759 |
| ATP13A4      | -4.619545911 | 0.000279913 | 0.013842003 |
| LOC101928100 | -5.685406206 | 0.000280804 | 0.013846285 |
| NME1         | 1.285128066  | 0.000285883 | 0.01398126  |
| NRN1         | -3.923715374 | 0.000285978 | 0.01398126  |
| ATP5G1       | 1.538792249  | 0.000287349 | 0.014008481 |
| ESR1         | -2.904223979 | 0.000290531 | 0.014107259 |
| PIK3R3       | -1.404894033 | 0.000291015 | 0.014107259 |
| PPP1R13B     | -1.085711197 | 0.000294596 | 0.014240723 |
| CDC37        | 1.245841372  | 0.000302189 | 0.014566852 |
| NAA10        | 1.213425686  | 0.000310024 | 0.014902783 |
| KDELR2       | 1.20453815   | 0.000313785 | 0.014999812 |
| ZNF440       | -2.000883113 | 0.000313212 | 0.014999812 |
| KCNRG        | -1.074718659 | 0.000319217 | 0.015217184 |
| SMOX         | 2.691973703  | 0.000335434 | 0.015946073 |
| SP8          | 8.27959086   | 0.000342118 | 0.016144894 |
| KLF4         | -2.641614035 | 0.00034243  | 0.016144894 |
| MAGI3        | -1.665393826 | 0.00034844  | 0.016383342 |



|           |              |             |             |
|-----------|--------------|-------------|-------------|
| SLC22A9   | -7.050970396 | 0.000350363 | 0.016428855 |
| EEF1A2    | 8.715232338  | 0.000351894 | 0.016455803 |
| FRMPD3    | -2.644008462 | 0.000355117 | 0.01651676  |
| BPGM      | -1.546454126 | 0.000355053 | 0.01651676  |
| COMP      | -5.197147598 | 0.000358513 | 0.016540595 |
| LGALS2    | -2.184231848 | 0.000357866 | 0.016540595 |
| HLA-E     | -1.000568402 | 0.000357202 | 0.016540595 |
| ZNF501    | -2.711762688 | 0.000360906 | 0.016606483 |
| GAGE2C    | 7.04070478   | 0.000362411 | 0.016613838 |
| GMPR      | -1.790787913 | 0.000362996 | 0.016613838 |
| PRMT5     | 1.116559764  | 0.000364245 | 0.016626757 |
| FOXP2     | -3.896682454 | 0.000370287 | 0.016813379 |
| GPI       | 1.012563906  | 0.000372315 | 0.016816723 |
| NUS1      | 1.215139248  | 0.000371781 | 0.016816723 |
| RPLP0     | 1.008756415  | 0.000376862 | 0.016933222 |
| SOCS7     | 1.03109021   | 0.000376607 | 0.016933222 |
| C1QB      | 1.543414432  | 0.000381672 | 0.017097054 |
| KLHL3     | -1.41712141  | 0.000382496 | 0.017097054 |
| SERPINB13 | -2.221074637 | 0.000384948 | 0.017162083 |
| MAP7      | 2.326589009  | 0.000387914 | 0.017249649 |
| BCAP31    | 1.171776469  | 0.000392441 | 0.017405993 |
| CYP3A5    | -2.375177927 | 0.000400138 | 0.017701742 |
| OSR2      | -2.06338223  | 0.000402224 | 0.017748384 |
| ITGA5     | 1.893106939  | 0.000404777 | 0.01781538  |
| FAM177A1  | 1.252445924  | 0.000410521 | 0.017930582 |
| CDKL4     | 8.456981937  | 0.000409873 | 0.017930582 |
| LGALS9    | -1.566233838 | 0.000409447 | 0.017930582 |
| ALOX15    | -4.799071152 | 0.000413646 | 0.01802135  |
| FBXL6     | 1.667087565  | 0.000414731 | 0.018022997 |
| MAFK      | 1.770652304  | 0.000425509 | 0.018379166 |
| TCHHL1    | 11.28722585  | 0.000427199 | 0.018379166 |
| VIPR1     | -4.484470231 | 0.000426166 | 0.018379166 |
| RBPM5     | -1.822976861 | 0.000424094 | 0.018379166 |
| CD8B      | -2.627388585 | 0.000431228 | 0.018506229 |
| SLC26A7   | 7.037551291  | 0.000442037 | 0.018922934 |
| FAM72D    | 1.320568981  | 0.00045219  | 0.019268372 |
| LSM5      | 1.356332718  | 0.000456825 | 0.019268372 |
| FSTL3     | 3.338910871  | 0.000454762 | 0.019268372 |
| EXOC3L4   | -4.737835947 | 0.000452684 | 0.019268372 |
| SCNN1B    | -4.143224743 | 0.00045646  | 0.019268372 |
| MFSB6     | -1.164911498 | 0.000456505 | 0.019268372 |
| SERPINF2  | -2.086131101 | 0.000462924 | 0.019477903 |
| VWA5A     | -1.773482148 | 0.000465718 | 0.019547647 |
| NRXN1     | -7.229356077 | 0.000474354 | 0.019861715 |
| SMPD1     | -1.382930641 | 0.000478349 | 0.01998036  |
| STRIP2    | 1.36417281   | 0.000485673 | 0.020237168 |
| GSN-AS1   | -2.595172939 | 0.000489959 | 0.020366428 |
| ITPK1     | 1.352843255  | 0.000500121 | 0.020721036 |
| MMP3      | 4.225423965  | 0.000502102 | 0.020721036 |
| SMAD6     | -1.734134576 | 0.000501812 | 0.020721036 |
| RABL2A    | -1.096709624 | 0.000510342 | 0.021010705 |
| IL34      | -2.583505903 | 0.000528553 | 0.021656832 |
| CPEB3     | -1.275482967 | 0.000551239 | 0.022532705 |
| TRIM65    | 1.293607496  | 0.000561692 | 0.022905596 |
| SLC39A4   | 2.443665989  | 0.000567848 | 0.023047413 |
| GTF2IRD2  | -1.231263925 | 0.000566983 | 0.023047413 |
| PTX3      | 8.096794287  | 0.000574044 | 0.023244056 |
| RFX2      | -1.585899819 | 0.000595039 | 0.023981335 |
| TMEM33    | 1.108539652  | 0.000603536 | 0.024210371 |

|            |              |             |             |
|------------|--------------|-------------|-------------|
| DMD        | -2.487908119 | 0.000602205 | 0.024210371 |
| ANKRD20A9P | -2.937261146 | 0.000611764 | 0.024483383 |
| MRPL57     | 1.486329489  | 0.000617222 | 0.024587439 |
| GAGE12B    | 8.009485925  | 0.0006163   | 0.024587439 |
| CFHR4      | 8.391215757  | 0.000622304 | 0.02473263  |
| ZNF221     | -2.045253939 | 0.00063421  | 0.025147732 |
| SPR        | 1.207509782  | 0.000637666 | 0.02522667  |
| ZNF439     | -2.327062032 | 0.000640594 | 0.025284362 |
| ZNF528     | -2.018661837 | 0.000645    | 0.025400019 |
| NR1D2      | -1.654279823 | 0.000652028 | 0.025618165 |
| ZNF812     | -3.394528916 | 0.00066068  | 0.025840103 |
| SHMT2      | 1.111931451  | 0.000667734 | 0.026001697 |
| KRT15      | -3.912332533 | 0.000667834 | 0.026001697 |
| BARX1      | 9.498391613  | 0.000674036 | 0.026183946 |
| TOP1MT     | 1.393666811  | 0.000683063 | 0.026356136 |
| TOMM5      | 1.502549302  | 0.000682798 | 0.026356136 |
| C20orf197  | 8.400468229  | 0.000681032 | 0.026356136 |
| TMEM178B   | -8.216475788 | 0.00068996  | 0.026562683 |
| C1orf74    | 3.229541672  | 0.000693403 | 0.02663566  |
| GATSL2     | -1.721192018 | 0.000697691 | 0.026740681 |
| PIGR       | -5.231976378 | 0.000705911 | 0.026935766 |
| ZNF281     | -2.434849194 | 0.000708302 | 0.0269672   |
| TOP1P1     | -1.978207666 | 0.000709961 | 0.026970697 |
| C4orf19    | -2.580909895 | 0.000713993 | 0.027064113 |
| ADAM8      | 1.967073785  | 0.00072352  | 0.027322028 |
| IKZF4      | -1.47171249  | 0.00072556  | 0.027322028 |
| FAM156B    | -1.415082903 | 0.000725284 | 0.027322028 |
| NOP2       | 1.515304822  | 0.000727438 | 0.027332916 |
| CALB1      | 5.528257592  | 0.000736283 | 0.027604992 |
| TIFA       | -1.555537509 | 0.000755275 | 0.02819421  |
| HERC6      | -1.753742547 | 0.000762121 | 0.028326858 |
| PIK3IP1    | -1.11936543  | 0.000774253 | 0.028715764 |
| S100A6     | 1.509095672  | 0.000781588 | 0.028925497 |
| IFITM10    | -2.488566669 | 0.000787091 | 0.0290044   |
| APOL4      | -2.171836521 | 0.000796731 | 0.029296897 |
| COX6A1     | 1.047957218  | 0.000808792 | 0.02954227  |
| SLC39A8    | 1.097782176  | 0.000810271 | 0.02954227  |
| AURKAIP1   | 1.369760277  | 0.000809624 | 0.02954227  |
| GBP4       | -1.521227941 | 0.000808263 | 0.02954227  |
| SALL4      | -2.051747671 | 0.000812953 | 0.029577408 |
| CBFA2T2    | -1.210678746 | 0.0008185   | 0.029716392 |
| KIAA1217   | -1.463895544 | 0.000820355 | 0.029721042 |
| USP53      | -1.136661848 | 0.000824422 | 0.029805615 |
| BOC        | -2.504139602 | 0.000826317 | 0.029811498 |
| RPL8       | 1.079644352  | 0.000831395 | 0.029931953 |
| RPS3       | 1.103332281  | 0.000835986 | 0.029971851 |
| GPRC5B     | -2.025058519 | 0.000835784 | 0.029971851 |
| EBNA1BP2   | 1.084811449  | 0.000839392 | 0.030031398 |
| PHB        | 1.18175869   | 0.000856274 | 0.03048486  |
| CYP4Z1     | -4.035673109 | 0.000866238 | 0.03048486  |
| SLC9A9     | -2.523654592 | 0.000863376 | 0.03048486  |
| LTB        | -2.446385982 | 0.000861303 | 0.03048486  |
| ZNF701     | -2.109052487 | 0.000858052 | 0.03048486  |
| PRSS3      | -4.015483715 | 0.000869364 | 0.030489774 |
| IST1       | -1.020229875 | 0.000869921 | 0.030489774 |
| GAGE7      | 7.840261493  | 0.000876889 | 0.030671502 |
| WWC1       | 1.705356432  | 0.00088079  | 0.030683223 |
| PARP14     | -1.327839424 | 0.000880531 | 0.030683223 |
| DNAH1      | -1.289191861 | 0.000886719 | 0.030827373 |

|           |              |             |             |
|-----------|--------------|-------------|-------------|
| EAF2      | -1.873786658 | 0.000897524 | 0.031140096 |
| C17orf77  | 8.193548651  | 0.000910431 | 0.031524355 |
| MRPL11    | 1.148588704  | 0.000917509 | 0.031705637 |
| CAMK2D    | -1.247613558 | 0.00092098  | 0.031761798 |
| RFPL1S    | 6.812752737  | 0.000928107 | 0.03194358  |
| INTS12    | -1.068377216 | 0.000939551 | 0.032272908 |
| ELF5      | -9.341780164 | 0.000943499 | 0.03234396  |
| C8orf4    | -3.048691206 | 0.000945817 | 0.032358992 |
| HSPD1     | 1.178953005  | 0.000952472 | 0.03245759  |
| TOMM7     | 1.332459073  | 0.000950639 | 0.03245759  |
| NDRG2     | -1.95141957  | 0.000956176 | 0.032519422 |
| PTTG2     | -2.110696259 | 0.000965195 | 0.032696935 |
| NEDD9     | -1.705410922 | 0.000965154 | 0.032696935 |
| TGFBI     | 2.786068417  | 0.000971689 | 0.032801565 |
| GABRP     | -3.415396297 | 0.000972096 | 0.032801565 |
| LOC441242 | -6.667430433 | 0.000978438 | 0.032942765 |
| TMEM183A  | 4.358760966  | 0.000988311 | 0.033089181 |
| FAM72C    | 1.386481822  | 0.000990781 | 0.033107469 |
| GPR98     | -3.930968506 | 0.000996207 | 0.033224272 |
| AIM2      | -2.217773672 | 0.001004003 | 0.033354997 |
| LOC441081 | -1.357587323 | 0.001003079 | 0.033354997 |
| SEC16B    | -1.686227126 | 0.00101472  | 0.033646084 |
| CUTA      | 1.158597867  | 0.001022652 | 0.033783096 |
| TRIB2     | -1.698268934 | 0.001022778 | 0.033783096 |
| MAGEC2    | 9.291860044  | 0.001034309 | 0.03396835  |
| ARMCX4    | -2.085094153 | 0.001033423 | 0.03396835  |
| GBP2      | -1.790218372 | 0.001033868 | 0.03396835  |
| TEF       | -2.028647594 | 0.001040319 | 0.034100659 |
| GNPNAT1   | 1.219499369  | 0.001058204 | 0.034489836 |
| PFN2      | 1.926983782  | 0.001061399 | 0.034512125 |
| ZNF471    | -3.692812633 | 0.001062899 | 0.034512125 |
| GAGE13    | 7.798483098  | 0.001079997 | 0.034823522 |
| ZNF736    | -1.977768955 | 0.001074808 | 0.034823522 |
| PER3      | -1.965564956 | 0.00107938  | 0.034823522 |
| ZNF680    | -1.203974424 | 0.001080583 | 0.034823522 |
| NCF2      | 1.399649985  | 0.001090065 | 0.034933145 |
| HAGHL     | 1.820249644  | 0.001087791 | 0.034933145 |
| TSTA3     | 1.201669448  | 0.001094469 | 0.035008754 |
| HDAC2     | 1.274063916  | 0.001101093 | 0.035155301 |
| FURIN     | 1.030258969  | 0.001115678 | 0.035555001 |
| DBP       | -1.417703647 | 0.001118065 | 0.035565217 |
| MOV10L1   | 4.681855684  | 0.001128593 | 0.035833883 |
| PDZD8     | 1.073143975  | 0.001146694 | 0.036274748 |
| NOP10     | 1.250937116  | 0.001145428 | 0.036274748 |
| GAGE12J   | 7.921457407  | 0.00115055  | 0.036329951 |
| SLC4A4    | -3.993702673 | 0.001156649 | 0.036455623 |
| CDKN2C    | -2.057265128 | 0.001158974 | 0.036462143 |
| SH3TC2    | 3.182293122  | 0.001161203 | 0.03646559  |
| PSMD4     | 1.034757102  | 0.001171935 | 0.03660224  |
| CD55      | 3.314701705  | 0.001171391 | 0.03660224  |
| MLC1      | 7.754445063  | 0.001175884 | 0.036659047 |
| PSMB5     | 1.17977385   | 0.001179948 | 0.036719219 |
| GUSBP1    | -1.366543093 | 0.001192916 | 0.037048594 |
| MRGPRX3   | 8.155594385  | 0.001213033 | 0.037276943 |
| GRHL3     | -2.818475357 | 0.001210561 | 0.037276943 |
| STX19     | -2.028071383 | 0.001212543 | 0.037276943 |
| C11orf63  | -2.021080425 | 0.001207606 | 0.037276943 |
| ZNF532    | -1.313607616 | 0.001210891 | 0.037276943 |
| MRPL18    | 1.146708206  | 0.00122815  | 0.037607186 |

|                 |              |             |             |
|-----------------|--------------|-------------|-------------|
| EHD3            | -2.209404494 | 0.001228064 | 0.037607186 |
| BEND3           | 1.923009912  | 0.001231089 | 0.037630227 |
| CD8A            | -2.786536551 | 0.001252451 | 0.038215289 |
| VIPR2           | -5.254577433 | 0.001259657 | 0.038299362 |
| FAM46B          | -2.934024804 | 0.001271917 | 0.038535962 |
| MYH11           | -2.954573356 | 0.001289471 | 0.038999127 |
| EIF2AK1         | 1.051152487  | 0.001293302 | 0.039046387 |
| EIF3B           | 1.257687459  | 0.001299403 | 0.039061837 |
| C1QTNF6         | 1.846751389  | 0.00129746  | 0.039061837 |
| PANX2           | 2.103810869  | 0.00130267  | 0.039061837 |
| LOC100506990    | -2.165688581 | 0.001302894 | 0.039061837 |
| AIMP2           | 1.664192411  | 0.001336902 | 0.040011722 |
| MARCO           | 3.667599732  | 0.001342183 | 0.04002879  |
| RARRES3         | -2.245372244 | 0.001340232 | 0.04002879  |
| EXPH5           | -2.048974462 | 0.00134445  | 0.04002879  |
| CYP2W1          | -6.647232788 | 0.001355355 | 0.040214312 |
| CDKN3           | 1.562073836  | 0.001374862 | 0.040710567 |
| LRRC49          | -1.588328197 | 0.001376812 | 0.040710567 |
| ALGIL           | -2.173826756 | 0.00137993  | 0.040732792 |
| ADAT2           | 1.376776438  | 0.001385912 | 0.040839306 |
| SEMA5A          | -1.794209392 | 0.001402329 | 0.041252455 |
| SPRYD7          | 1.462664788  | 0.001409752 | 0.041375807 |
| SELENBP1        | -2.131862676 | 0.001411331 | 0.041375807 |
| TMC8            | -1.629255297 | 0.001418778 | 0.041523393 |
| PTGIS           | -3.315757027 | 0.001445828 | 0.042100255 |
| PON2            | 1.104258189  | 0.001449218 | 0.042127682 |
| TRPV6           | -4.418266759 | 0.001474035 | 0.042704837 |
| BUB1            | 1.248911386  | 0.001490923 | 0.043063556 |
| KCNJ2           | -1.826001683 | 0.001491422 | 0.043063556 |
| PSG2            | -9.06667117  | 0.001507564 | 0.043456744 |
| CYP2E1          | -3.153934553 | 0.001510788 | 0.043476852 |
| BACE2           | 1.433664149  | 0.00151629  | 0.043562321 |
| SLC7A5          | 2.915672738  | 0.001557056 | 0.044584644 |
| PSD3            | -1.199030495 | 0.001563868 | 0.044705326 |
| GPC5            | 7.901735921  | 0.00157405  | 0.044921779 |
| PIF1            | 1.431730386  | 0.001581415 | 0.045057234 |
| PSMB3           | 1.145840191  | 0.001591097 | 0.045183474 |
| ABR             | -1.275494345 | 0.00159072  | 0.045183474 |
| TNFAIP2         | -1.721286213 | 0.001598159 | 0.045309245 |
| CCT4            | 1.020336419  | 0.001606018 | 0.045457166 |
| LOC100507156    | 9.044521115  | 0.001611715 | 0.045510672 |
| BCO2            | -1.800196947 | 0.001613197 | 0.045510672 |
| DTX2P1-UPK3BP1- |              |             |             |
| PMS2P11         | -1.737185092 | 0.001623541 | 0.045727532 |
| ARHGEF28        | -1.882334154 | 0.001637904 | 0.045997232 |
| RHD             | -1.202986034 | 0.001643064 | 0.046051279 |
| TRIM62          | -1.445968422 | 0.001679344 | 0.046991599 |
| DHFRL1          | -2.926688137 | 0.001700514 | 0.047506741 |
| RPL36A          | 1.263418561  | 0.001716433 | 0.047796261 |
| GAGE2B          | 7.552566388  | 0.001714048 | 0.047796261 |
| ENTPD3          | 2.652302064  | 0.001727719 | 0.047967437 |
| SENP7           | -1.092236819 | 0.001728155 | 0.047967437 |
| CEP55           | 1.142574908  | 0.001747636 | 0.048430066 |
| LOC101926943    | -1.596292497 | 0.001755895 | 0.048561371 |
| APOL6           | -1.215576119 | 0.001758018 | 0.048561371 |
| MFI2            | 1.981729684  | 0.001765378 | 0.048686514 |
| MRPL24          | 1.403614531  | 0.001773555 | 0.048755765 |
| CAND2           | -3.245966166 | 0.001771338 | 0.048755765 |
| EGR2            | -2.199119231 | 0.001777516 | 0.048760673 |

|         |              |             |             |
|---------|--------------|-------------|-------------|
| KRTCAP2 | 1.271591254  | 0.001784701 | 0.048828163 |
| MTUS1   | -1.522261035 | 0.001789418 | 0.048879515 |
| EPCAM   | 2.304309915  | 0.001800745 | 0.048955799 |
| ETNK2   | -1.809996813 | 0.0017996   | 0.048955799 |
| PTPN13  | -1.645394344 | 0.001797097 | 0.048955799 |
| FGFR2   | -2.361839827 | 0.001812837 | 0.04920679  |
| LOXL2   | 1.913328218  | 0.001821846 | 0.049373468 |
| ITGB4   | 1.923209501  | 0.001829126 | 0.049492805 |
| ZNF354C | -1.702728866 | 0.001837798 | 0.049649395 |

---

## **Methods**

### **RNA sequencing and analysis**

An oligo-dT primer containing an Illumina-compatible sequence at its 5' end was hybridized to the RNA for reverse transcription. After degradation of the RNA template, second strand synthesis was initiated with a random primer containing an Illumina-compatible linker sequence at its 5' end. The double-stranded library was, then, purified using magnetic beads. The library was amplified to add the adapter sequences required for cluster generation. Purified libraries were sequenced with HiSeq 2500 (Illumina) at an average of 58 million paired-end 100-bp reads. Reads were aligned to the human genome (hg19) using TopHat v2.1.1 (<https://ccb.jhu.edu/software/tophat/index.shtml>). The number of mapped reads for each gene was quantified using StringTie.
